# Supplementary material for: Unveiling the hidden depths: advancements in underwater image enhancement using deep learning and auto-encoders
Source: PeerJ journal article supplement (doi:10.7717/peerj-cs.2392), 2024-11-29
Supplement: Dataset_details.pdf [file Dataset_details.pdf]

In this work, we have considered two data sets. The dataset links are given below:

Dataset name: EUVP

Dataset Link: <https://irvlab.cs.umn.edu/resources/euwp-dataset>

Dataset name: UIEB

Dataset Link: [https://li-chongyi.github.io/proj\\_benchmark.html](https://li-chongyi.github.io/proj_benchmark.html)

The proposed work code is available in the supplemental file 2
